# Supplementary material for: Hydrogen Peroxide Increases during Endodormancy and Decreases during Budbreak in Grapevine (Vitis vinifera L.) Buds
Source: MDPI journal article supplement (doi:10.3390/antiox10060873), 2021-05-29
Supplement: s1 [file s1]

**Table S1.** *V. vinifera* peroxidase genes (*VvPODs*) whose expression is regulated by ABA.

| <b>Peroxidase Genes</b> | <b>References</b> |
|-------------------------|-------------------|
| <i>VvPOD2</i>           | [43, 44]          |
| <i>VvPOD4</i>           | [43]              |
| <i>VvPOD14</i>          | [44]              |
| <i>VvPOD18</i>          | [44]              |
| <i>VvPOD19</i>          | [44]              |
| <i>VvPOD20</i>          | [44]              |
| <i>VvPOD21</i>          | [44]              |
| <i>VvPOD22</i>          | [44]              |
| <i>VvPOD23</i>          | [43,44]           |
| <i>VvPOD24</i>          | [43,44]           |
| <i>VvPOD30</i>          | [43]              |
| <i>VvPOD31</i>          | [44]              |
| <i>VvPOD32</i>          | [43,44]           |
| <i>VvPOD36</i>          | [43,44]           |
| <i>VvPOD37</i>          | [44]              |
| <i>VvPOD38</i>          | [43, 44]          |
| <i>VvPOD40</i>          | [44]              |
| <i>VvPOD46</i>          | [44]              |
